# Supplementary material
Source: publisher figshare collection journal article supplement (https://acs.figshare.com/ndownloader/files/10430832)
Supplement: Supplementary file 1 [file 10430832]

## *Supporting Information*

# Bioimaging and Biosensing of Ferrous Ion in Neurons and HepG2 Cells Upon Oxidative Stress

Zhichao Liu, <sup>+</sup> Shengnan Wang, <sup>+</sup> Wanying Li, and Yang Tian\*

Shanghai Key Laboratory of Green Chemistry and Chemical Processes, Department of Chemistry, School of Chemistry and Molecular Engineering, East China Normal University, Dongchuan Road 500, Shanghai 200241, China

\*E-mail: ytian@chem.ecnu.edu.cn

## **Contents**

1. Synthetic route of FeL (Scheme S1).
2. Characterization of FeL (Figure S1-S4).
3. UV-vis absorption spectrum of AuNCs and sulfo-cyanine 7 NHS ester (Figure S5 and S6).
4. FT-IR characterization of AuNC@FeL@Cy7 probe (Figure S7).
5. Absorption spectra of FeL in the presence of different metal ions and titration of Fe<sup>2+</sup> (Figure S8).
6. Selectivity of AuNC@FeL@Cy7 probe (Figure S9).
7. Stability investigation of AuNC@FeL@Cy7 probe (Figure S10-S12).
8. Cytotoxicity and biocompatibility study of AuNC@FeL@Cy7 probe (Figure S13-S15).
9. Confocal fluorescence imaging of HepG2 cells with different concentrations of Fe<sup>2+</sup> (Figure S16).
10. Co-localization imaging of HepG2 cells with AuNC@FeL@Cy7 probe (Figure S17).
11. XPS characterization of AuNC@FeL@Cy7@AMP probe and AuNC@FeL@Cy7@TPP probe (Figure S18).
12. Co-localization imaging of HepG2 cells with AuNC@FeL@Cy7@AMP probe and AuNC@FeL@Cy7@TPP prob (Figure S19).
13. Confocal fluorescence imaging of HepG2 cells with organelle-targeted probes (Figure S20).

1. Synthetic route of FeL (Scheme S1).

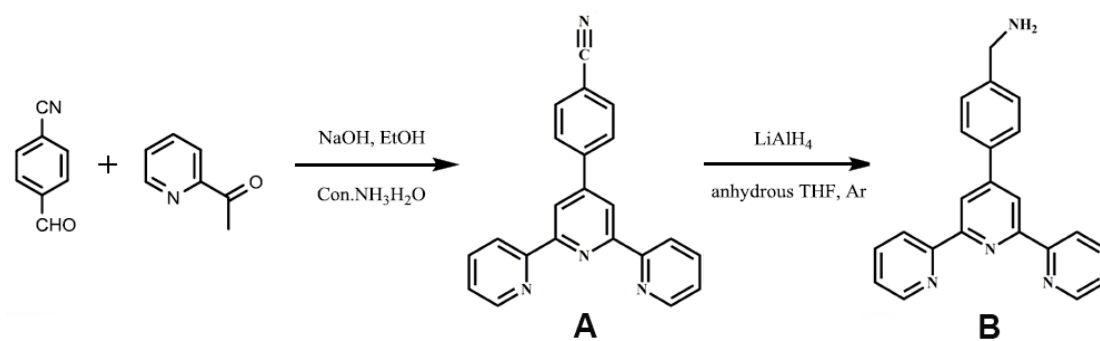

Scheme S1. Synthetic route for Fe<sup>2+</sup> ligand (FeL).

2. Characterization of FeL (Figure S1-S4).

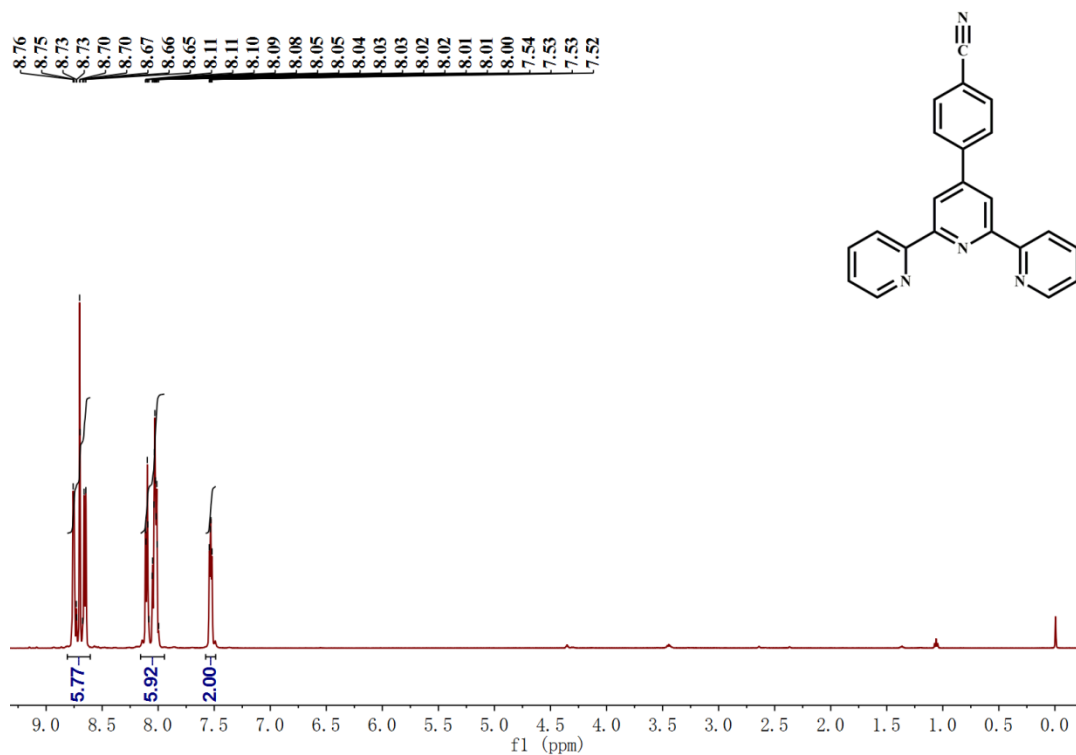

Figure S1. <sup>1</sup>H NMR spectrum (500 MHz) of compound **A** in DMSO.

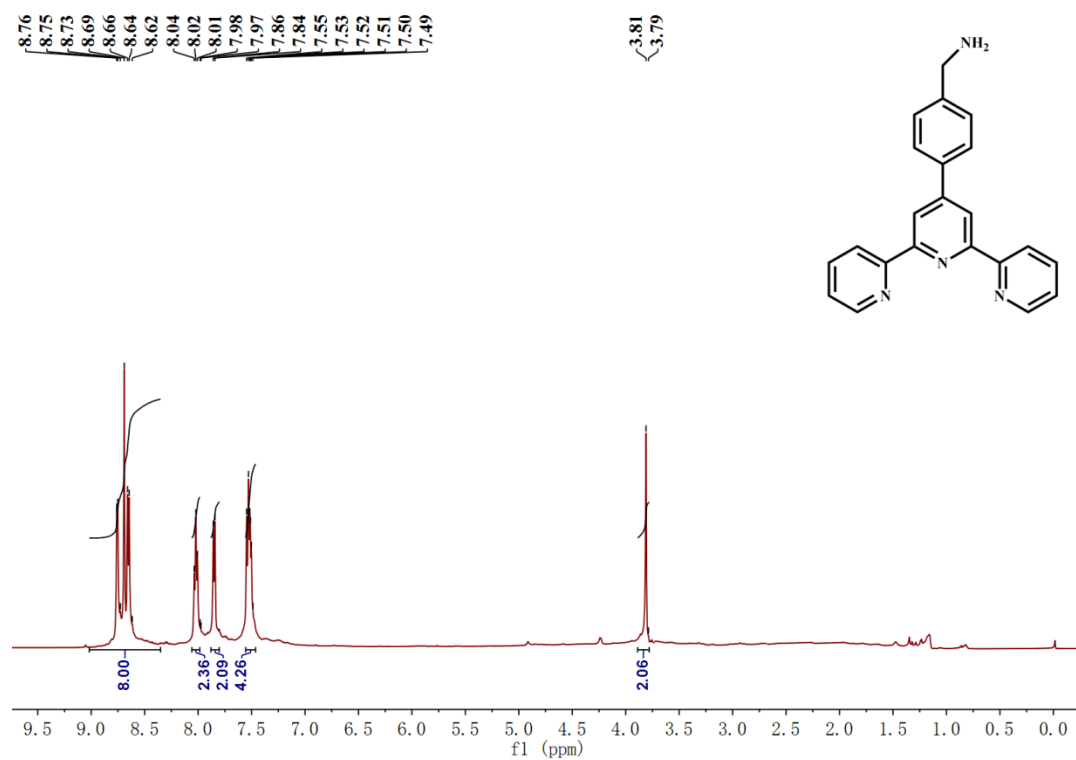

Figure S2. <sup>1</sup>H NMR spectrum (500 MHz) of FeL in DMSO.

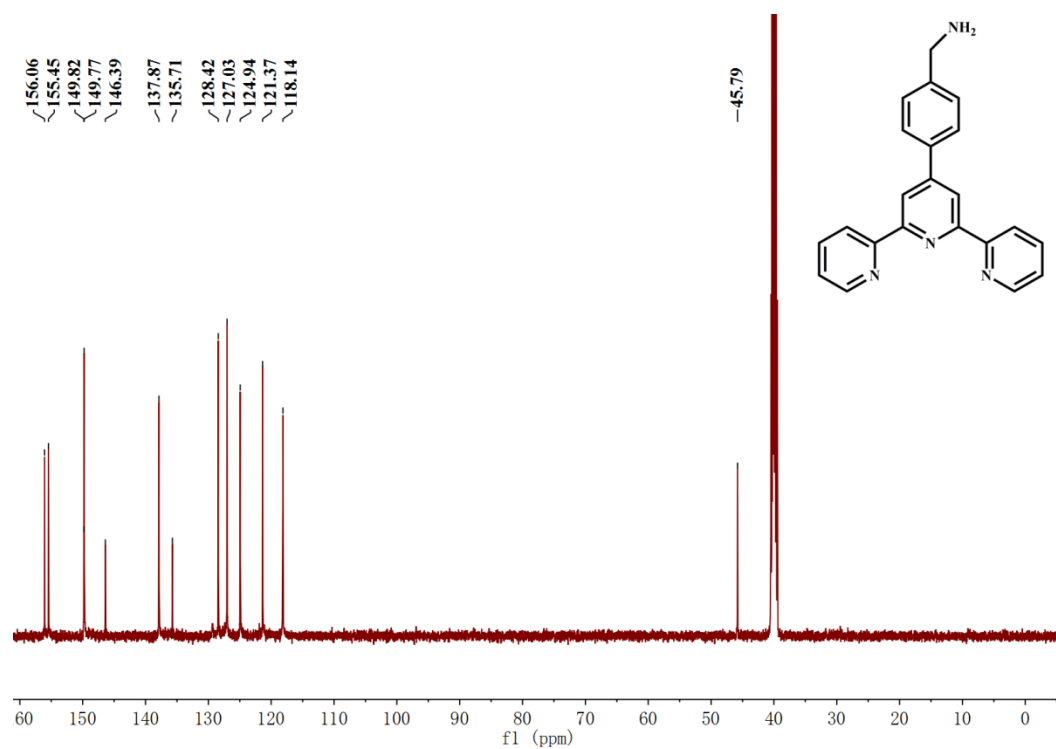

Figure S3. <sup>13</sup>C NMR spectrum (500 MHz) of FeL in DMSO.

## Mass Spectrum List Report

### Analysis Info

Analysis Name D:\Data\chem. deptianyang\LZC-0725-1\_P1-D-1\_01\_5781.d  
 Method Tune\_pos\_low\_LC with calibration\_2min.m  
 Sample Name LZC-0725-1  
 Comment

Acquisition Date 7/25/2017 12:13:14 PM  
 Operator ECNU-Chem  
 Instrument maXis impact 282001.00122

### Acquisition Parameter

|             |        |                      |          |                |           |
|-------------|--------|----------------------|----------|----------------|-----------|
| Source Type | ESI    | Ion Polarity         | Positive | Set Nebulizer  | 1.5 Bar   |
| Focus       | Active | Set Capillary        | 3700 V   | Set Dry Heater | 180 °C    |
| Scan Begin  | 50 m/z | Set End Plate Offset | -500 V   | Set Dry Gas    | 6.0 l/min |

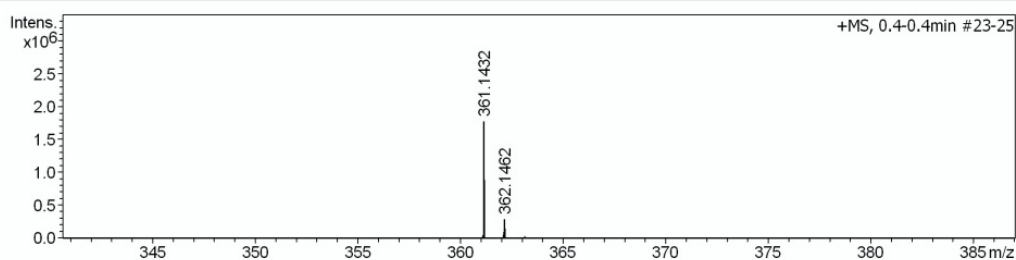

| # | m/z      | Res.  | S/N     | I       | I %   | FWHM   |
|---|----------|-------|---------|---------|-------|--------|
| 1 | 361.1432 | 45767 | 29640.0 | 1771220 | 100.0 | 0.0079 |
| 2 | 362.1462 | 32695 | 4901.7  | 292777  | 16.5  | 0.0111 |
| 3 | 363.1494 | 21670 | 291.1   | 17379   | 1.0   | 0.0168 |

| Meas. m/z | # | Ion Formula | m/z      | err [ppm] | mSigma | Score | rdB   | e <sup>-</sup> Conf | N-Rule |
|-----------|---|-------------|----------|-----------|--------|-------|-------|---------------------|--------|
| 361.1432  | 1 | C22H18N4Na  | 361.1424 | -2.2      | 53.0   | 2     | 47.03 | 15.5 even           | ok     |

Figure S4. Elemental composition of MS for FeL.

3. UV-vis absorption spectrum of AuNCs and sulfo-cyanine 7 NHS ester (Figure S5 and S6).

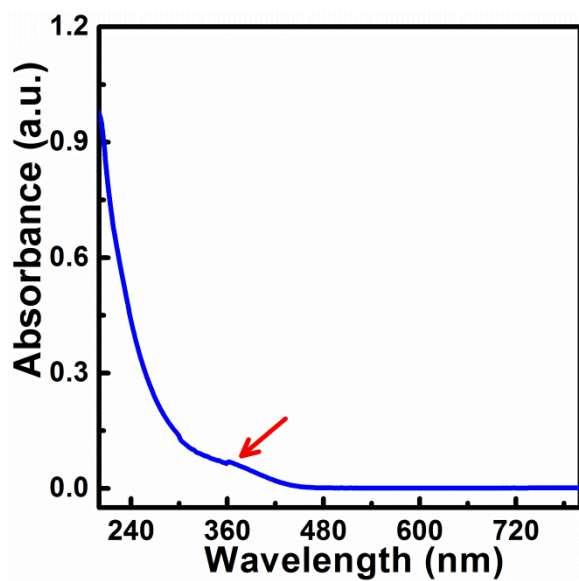

Figure S5. UV-vis absorption spectrum of AuNCs.

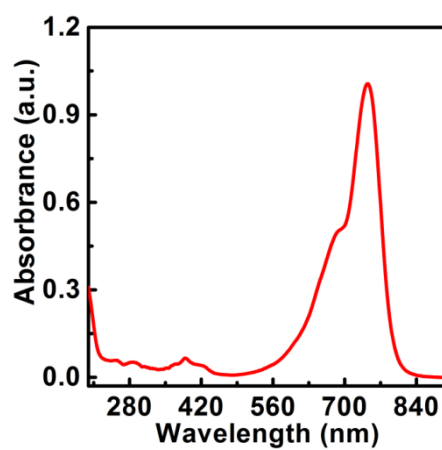

Figure S6. UV-vis absorption spectrum of sulfo-cyanine 7 NHS ester.

4. FT-IR characterization of AuNC@FeL@Cy7 probe (Figure S7).

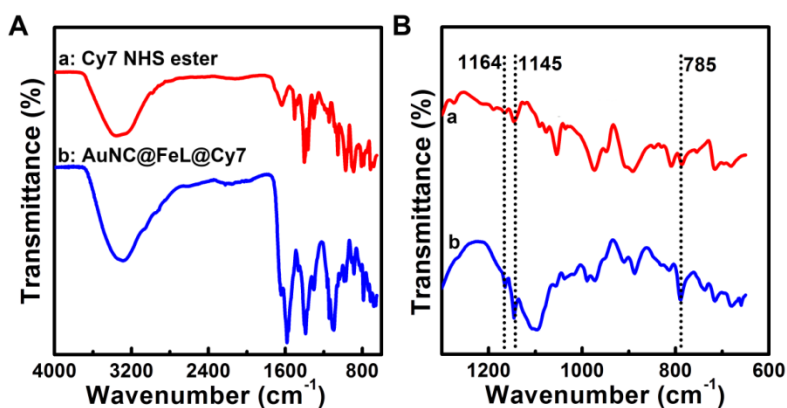

Figure S7. (A) FT-IR spectra of (a) Cy7 NHS ester and (b) AuNC@FeL@Cy7 between 4000-600  $\text{cm}^{-1}$ . (B) FT-IR spectra of (a) Cy7 NHS ester and (b) AuNC@FeL@Cy7 between 1300-600  $\text{cm}^{-1}$ .

5. Absorption spectra of FeL in the presence of different metal ions and titration of  $\text{Fe}^{2+}$  (Figure S8).

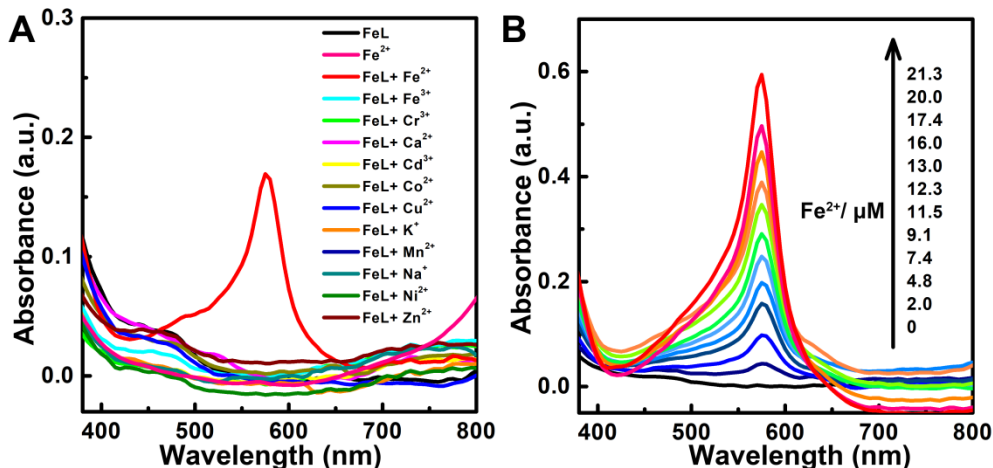

Figure S8. (A) Absorption spectra of FeL in the presence of various metal ions. The concentration of metal ions (except  $\text{K}^+$ ,  $\text{Na}^+$  and  $\text{Ca}^{2+}$ ) is 9  $\mu\text{M}$ . The concentrations of  $\text{K}^+$ ,  $\text{Na}^+$  and  $\text{Ca}^{2+}$  are 100 mM, 50 mM and 10 mM, respectively. (B) Absorption spectra of FeL in the presence of different concentrations of  $\text{Fe}^{2+}$  from 0 to 21.3  $\mu\text{M}$ .

## 6. Selectivity of AuNC@FeL@Cy7 probe (Figure S9).

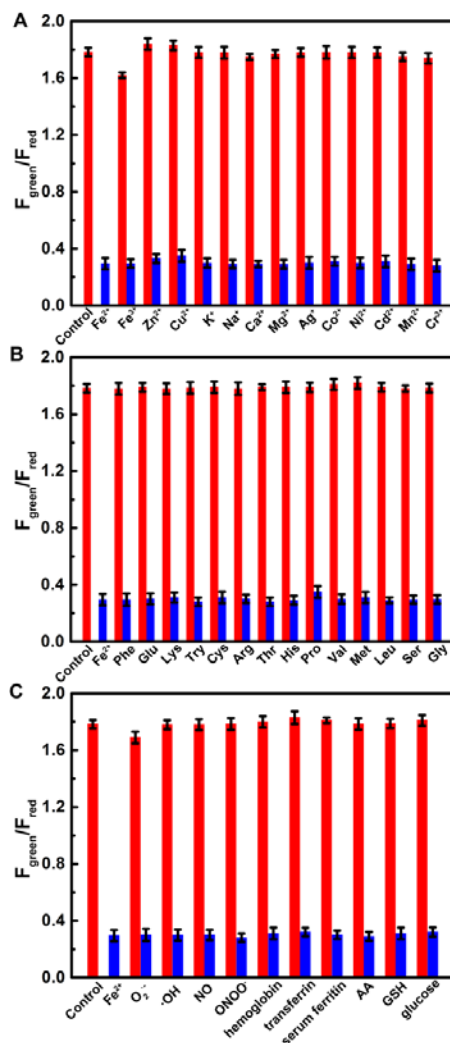

Figure S9. Selectivity and competition tests of AuNC@FeL@Cy7 probe toward various (A) metal ions, (B) amino acids, and (C) common ROS, Fe-containing proteins, ascorbic acid (AA), glutathione (GSH), glucose. The red bars represent the fluorescence signal ratio ( $F_{\text{green}}/F_{\text{red}}$ ) of the fluorescent probe after addition of potential interferences, while the blue columns represent the fluorescence signal ratio ( $F_{\text{green}}/F_{\text{red}}$ ) of the developed probe in the presence of potential interferences followed by addition of  $\text{Fe}^{2+}$ . The concentration of amino acids, GSH, ROS and metal ions (except  $\text{K}^+$ ,  $\text{Na}^+$  and  $\text{Ca}^{2+}$ ) is 45  $\mu\text{M}$ . The concentrations of  $\text{K}^+$ ,  $\text{Na}^+$ ,  $\text{Ca}^{2+}$ , AA and glucose are 100 mM, 50 mM, 10 mM, 1 mM and 100 mM, respectively.  $F_{\text{green}}$  and  $F_{\text{red}}$  represent the average fluorescence intensity between 580-760 nm and 765-900 nm, respectively. The excitation wavelength was 552 nm.

7. Stability investigation of AuNC@FeL@Cy7 probe (Figure S10-S12).

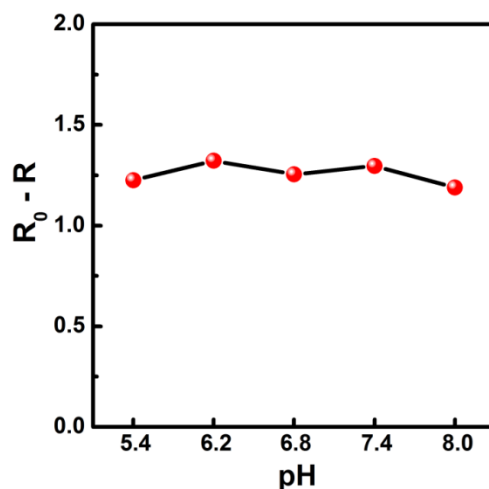

Figure S10. The difference value of fluorescence ratio ( $F_{\text{green}}/F_{\text{red}}$ ) of AuNC@FeL@Cy7 probe at various pH from 5.4 to 8.0.  $R_0$  and  $R$  represent the  $F_{\text{green}}/F_{\text{red}}$  of AuNC@FeL@Cy7 probe in the present of 0 and 50  $\mu\text{M}$   $\text{Fe}^{2+}$ , respectively.  $F_{\text{green}}$  and  $F_{\text{red}}$  represent the average fluorescence intensity between 580-760 nm and 765-900 nm, respectively. The excitation wavelength was 552 nm.

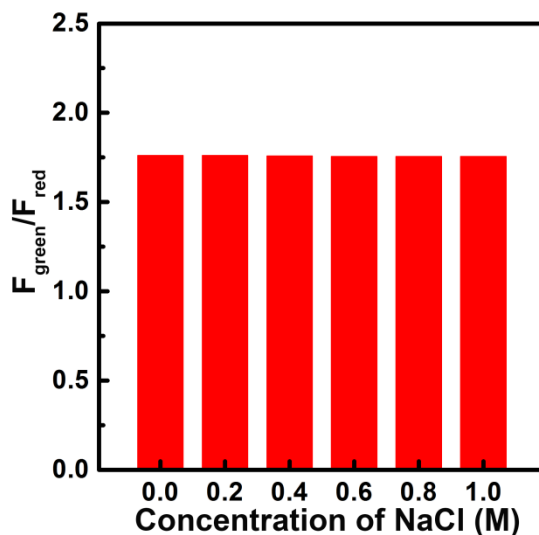

Figure S11. Fluorescent signal ratios ( $F_{\text{green}}/F_{\text{red}}$ ) of AuNC@FeL@Cy7 probe in the present of different concentrations of NaCl.  $F_{\text{green}}$  and  $F_{\text{red}}$  represent the average fluorescence intensity between 580-760 nm and 765-900 nm, respectively. The excitation wavelength was 552 nm.

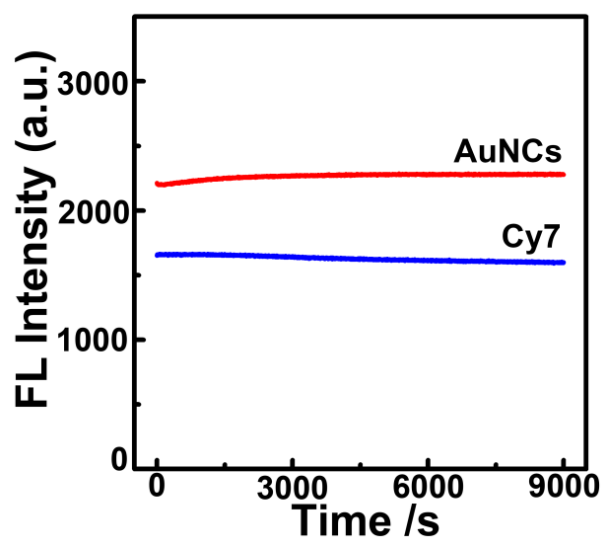

Figure S12. Fluorescence intensity of AuNCs and Cy7 obtained from AuNC@FeL@Cy7 probe as a function of time under a 552 nm excitation.

8. Cytotoxicity and biocompatibility study of AuNC@FeL@Cy7 probe(Figure S13-S15).

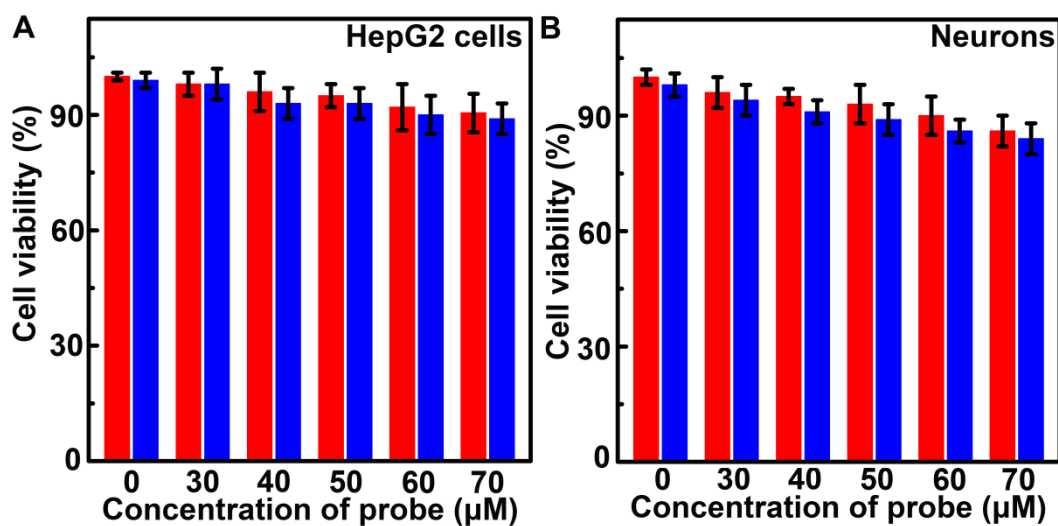

Figure S13. Cell viability of (A) HepG2 cells and (B) neurons incubated with different concentrations of AuNC@FeL@Cy7 probe for 24 h (red bars) or 48 h (blue bars).

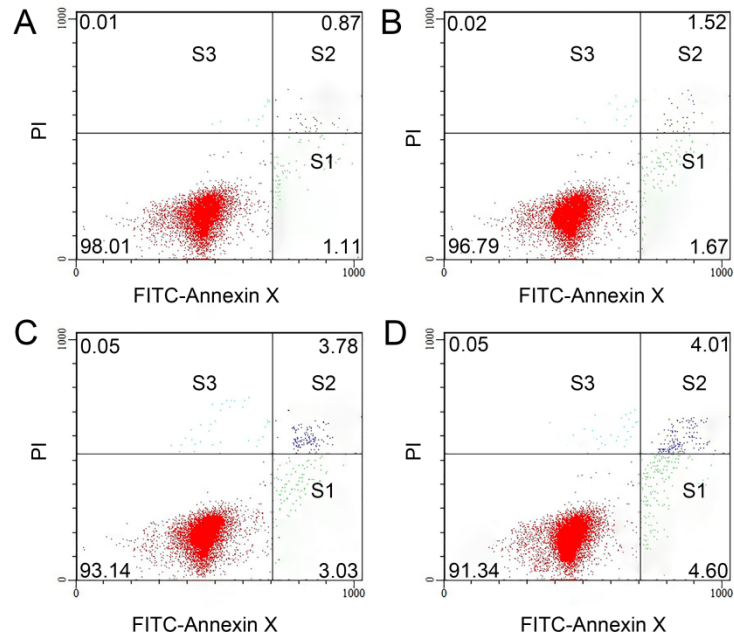

Figure S14. HepG2 cells incubated with AuNC@FeL@Cy7 probe at concentrations of (A) 0  $\mu$ M, (B) 30  $\mu$ M, (C) 40  $\mu$ M, and (D) 60  $\mu$ M for 24 h. S1, S2, and S3 represent the regions of early apoptotic, late apoptotic and dead cells, respectively.

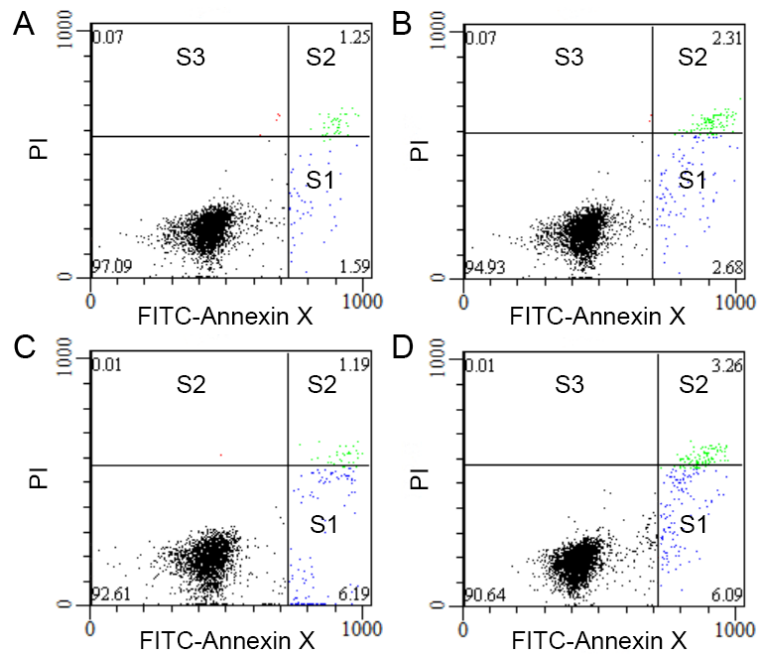

Figure S15. Neurons incubated with AuNC@FeL@Cy7 probe at concentrations of (A) 0  $\mu$ M, (B) 30  $\mu$ M, (C) 40  $\mu$ M, and (D) 60  $\mu$ M for 24 h. S1, S2, and S3 represent the regions of early apoptotic, late apoptotic and dead cells, respectively.

9. Confocal fluorescence imaging of HepG2 cells with different concentrations of  $\text{Fe}^{2+}$  (Figure S16).

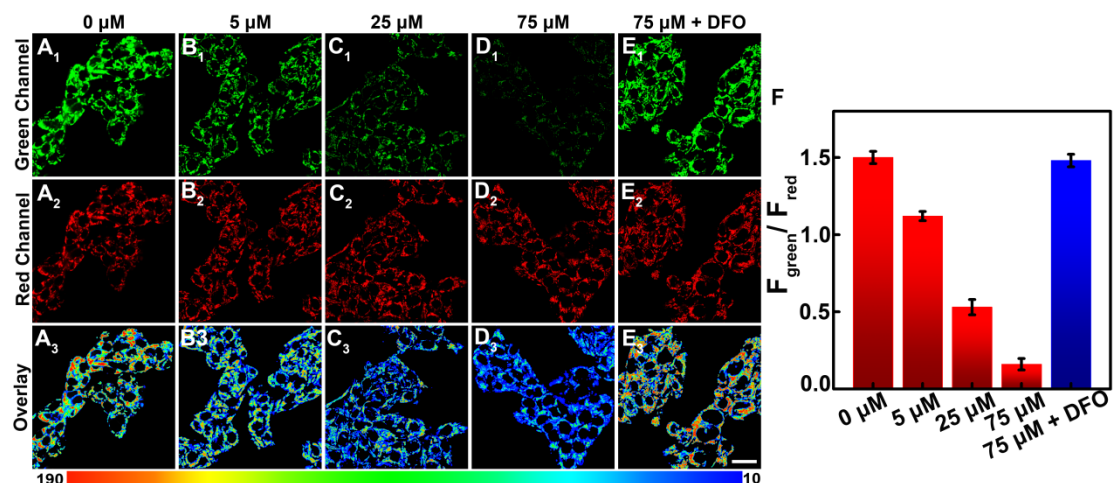

Figure S16. Confocal fluorescence microscopic images of HepG2 cells collected from different channels treated with AuNC@FeL@Cy7 probe (30  $\mu\text{M}$ ) in the presence of different concentrations of  $\text{Fe}^{2+}$ : (A<sub>1</sub>-A<sub>3</sub>) 0, (B<sub>1</sub>-B<sub>3</sub>) 5, (C<sub>1</sub>-C<sub>3</sub>) 25, and (D<sub>1</sub>-D<sub>3</sub>) 75  $\mu\text{M}$ . (E<sub>1</sub>-E<sub>3</sub>) Confocal fluorescence microscopic images of HepG2 cells collected from different channels treated with AuNC@FeL@Cy7 probe (30  $\mu\text{M}$ ) in the presence of 75  $\mu\text{M}$   $\text{Fe}^{2+}$  followed by adding 100  $\mu\text{M}$  DFO for 1 h. (F) Summarized data of average fluorescence intensity ratio ( $F_{\text{green}}/F_{\text{red}}$ ) obtained from A-E. The data were obtained based on the statistical analysis of more than 30 neurons.  $F_{\text{green}}$  and  $F_{\text{red}}$  represent the average fluorescence intensity collected from green channel (580-760 nm) and red channel (765-900 nm), respectively. The excitation wavelength was 552 nm. Scale = 25  $\mu\text{m}$ .

10. Co-localization imaging of HepG2 cells with AuNC@FeL@Cy7 probe (Figure S17).

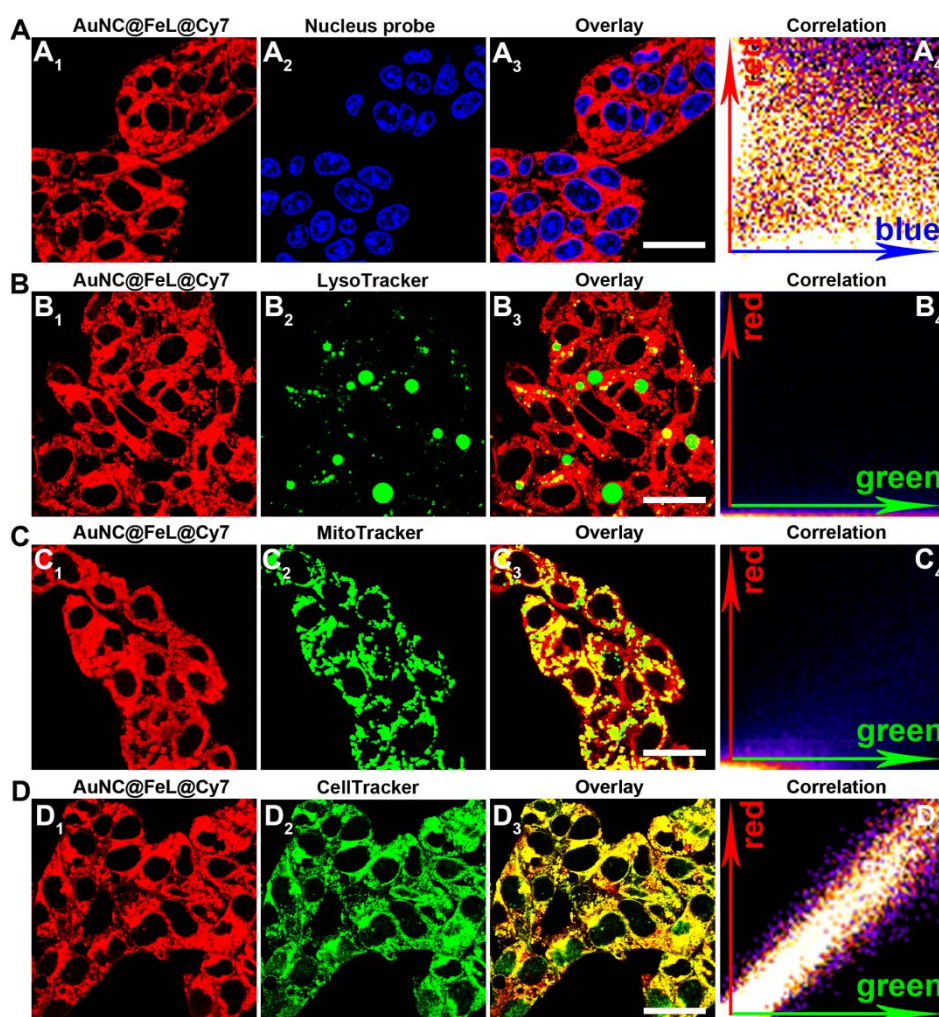

Figure S17. Co-localization imaging of AuNC@FeL@Cy7 probe with (A) nucleus, (B) lysosomes, (C) mitochondria, and (D) cytoplasm probes. (A<sub>1</sub>, B<sub>1</sub>, C<sub>1</sub>, and D<sub>1</sub>) represent the fluorescence images of AuNC@FeL@Cy7 probe collected from 765-900 nm excited at 552 nm. (A<sub>2</sub>, B<sub>2</sub>, C<sub>2</sub>, and D<sub>2</sub>) represent the fluorescence images of nucleus probe (Hoechst 33342) collected from 410-450 nm at excitation of 405 nm, the images of lysosomes probe (LysoTracker Green) collected from 500-550 nm at excitation of 488 nm, those of mitochondrial probe (MitoTracker Green) collected from 500-550 nm at excitation of 488 nm, and those of cytoplasm probe (CellTracker Green CMFDA) collected from 500-550 nm at excitation of 488 nm, respectively. (A<sub>3</sub>, B<sub>3</sub>, C<sub>3</sub>, and D<sub>3</sub>) are the overlay images of A<sub>1</sub> and A<sub>2</sub>, B<sub>1</sub> and B<sub>2</sub>, C<sub>1</sub> and C<sub>2</sub>, D<sub>1</sub> and D<sub>2</sub>, respectively. (A<sub>4</sub>, B<sub>4</sub>, C<sub>4</sub>, and D<sub>4</sub>) are the fluorescence correlation plots of A<sub>1</sub> and A<sub>2</sub>, B<sub>1</sub> and B<sub>2</sub>, C<sub>1</sub> and C<sub>2</sub>, D<sub>1</sub> and D<sub>2</sub>, respectively. Scale = 25  $\mu$ m.

11. XPS characterization of AuNC@FeL@Cy7@AMP probe and AuNC@FeL@Cy7@TPP probe (Figure S18).

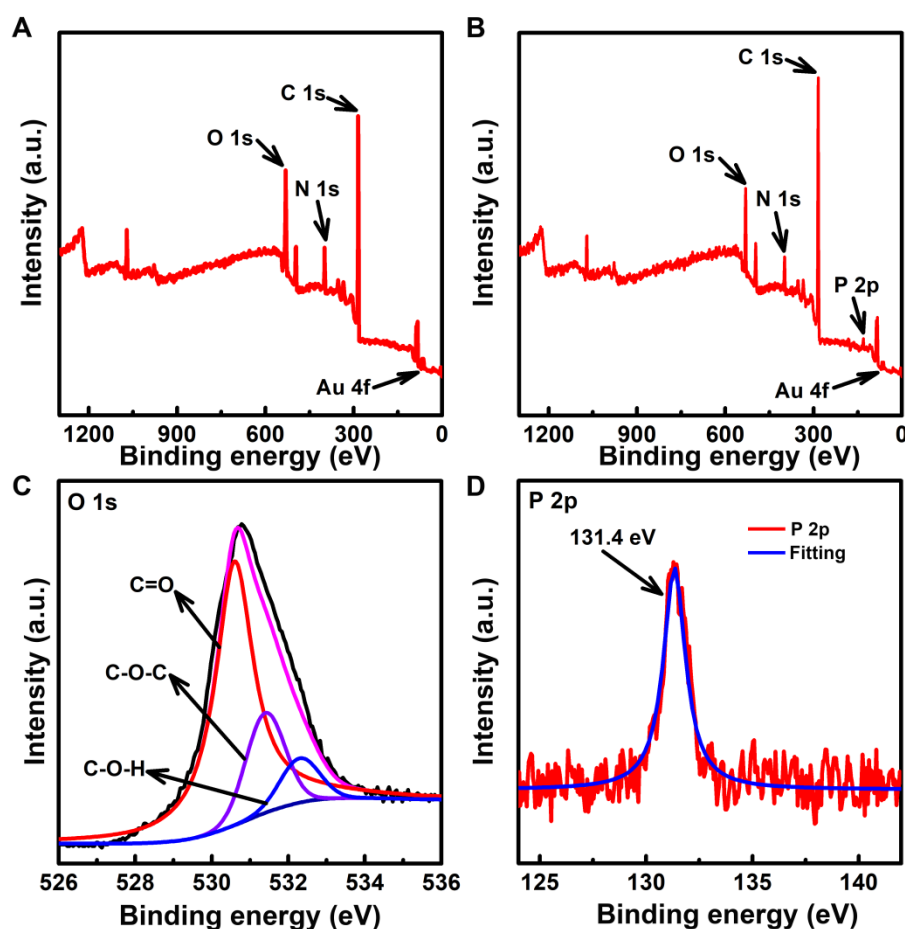

Figure S18. (A and B) XPS survey spectra of (A) AuNC@FeL@Cy7@AMP and (B) AuNC@FeL@Cy7@TPP probes. (C) XPS spectrum of O 1s region of AuNC@FeL@Cy7@AMP probe. (D) XPS spectrum of P 2p region of AuNC@FeL@Cy7@TPP probe.

12. Co-localization imaging of HepG2 cells with AuNC@FeL@Cy7@AMP probe and AuNC@FeL@Cy7@TPP probe (Figure S19).

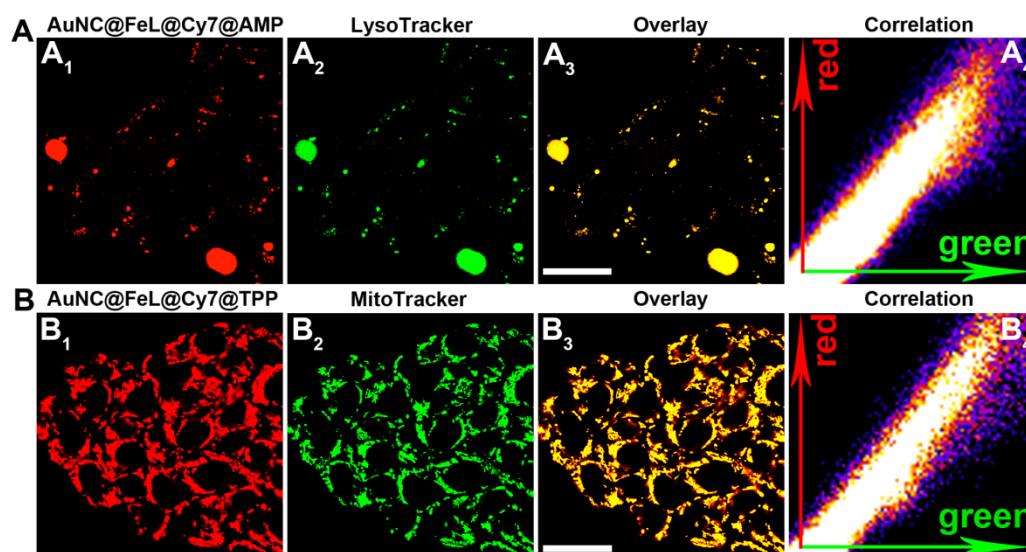

Figure S19. (A) Confocal fluorescence microscopic images of HepG2 cells treated with AuNC@FeL@Cy7@AMP probe and LysoTracker (LysoTracker Green). (A<sub>1</sub> and A<sub>2</sub>) represent the fluorescence images collected from AuNC@FeL@Cy7@AMP probe and LysoTracker, respectively. (A<sub>3</sub>) is the overlay images of A<sub>1</sub> and A<sub>2</sub>. A<sub>4</sub> shows the fluorescence correlation plot of A<sub>1</sub> and A<sub>2</sub>, respectively. (B) Confocal fluorescence microscopic images of HepG2 cells treated with AuNC@FeL@Cy7@TPP probe and MitoTracker (MitoTracker Green). (B<sub>1</sub> and B<sub>2</sub>) represent the fluorescence images collected from AuNC@FeL@Cy7@TPP probe and MitoTracker, respectively. (B<sub>3</sub>) is the overlay image of B<sub>1</sub> and B<sub>2</sub>. (B<sub>4</sub>) shows the fluorescence correlation plot of B<sub>1</sub> and B<sub>2</sub>, respectively. Scale = 25  $\mu$ m.

13. Confocal fluorescence imaging of HepG2 cells with organelle-targeted probes  
(Figure S20).

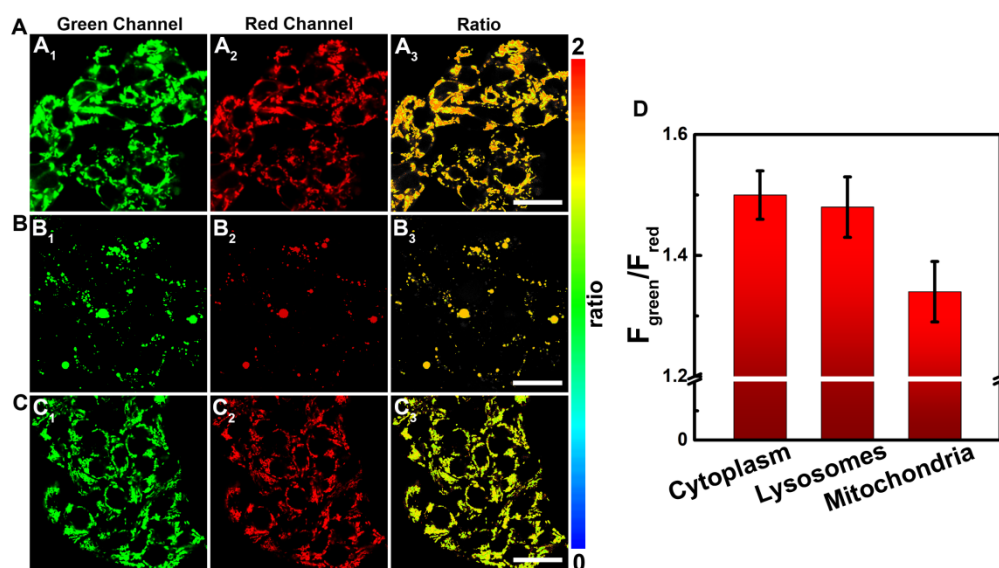

Figure S20. Confocal fluorescence microscopic images of HepG2 cells collected from different channels treated with (A) AuNC@FeL@Cy7 probe, (B) AuNC@FeL@Cy7@AMP probe, and (C) AuNC@FeL@Cy7@TPP probe, respectively. (A<sub>1</sub>, A<sub>2</sub>, and A<sub>3</sub>) represent the fluorescence images of AuNC@FeL@Cy7 probe collected from green channel (580-760 nm), red channel (765-900 nm) and ratio of green channel to red channel, respectively. (B<sub>1</sub>, B<sub>2</sub>, and B<sub>3</sub>) represent the fluorescence images of AuNC@FeL@Cy7@AMP probe collected from green channel (580-760 nm), red channel (765-900 nm) and ratio of green channel to red channel, respectively. (C<sub>1</sub>, C<sub>2</sub>, and C<sub>3</sub>) represent the fluorescence images of AuNC@FeL@Cy7@TPP probe collected from green channel (580-760 nm), red channel (765-900 nm) and ratio of green channel to red channel, respectively (D) Summarized data of average fluorescence intensity ratio ( $F_{\text{green}}/F_{\text{red}}$ ) obtained from A-C.  $F_{\text{green}}$  and  $F_{\text{red}}$  represent the average fluorescence intensity collected from green channel (580-760 nm) and red channel (765-900 nm), respectively. The excitation wavelength was 552 nm. Scale = 25  $\mu\text{m}$ .
